# Supplementary material for: Survey on the Indications and Use of Respiratory Rehabilitation in Idiopathic Pulmonary Fibrosis Patients by Spanish Pulmonologists
Source: PubMed Central journal article supplement — Open Respir Arch. 2021 Apr 19;3(3):100100. [Article in Spanish] doi: 10.1016/j.opresp.2021.100100 (PMC10369541; doi:10.1016/j.opresp.2021.100100), 2021-04-19
Supplement: mmc1.pdf [file mmc1.pdf]

## Anexo 1

### ÁREA EPID NOVIEMBRE de 2019

Encuesta sobre la indicación y utilización de la rehabilitación respiratoria en los pacientes con FPI en España, en la práctica clínica. Reunión de Invierno Málaga 2019.

-Centro/Hospital de Trabajo

-Servicio

-Localidad y Provincia

**1. Dispone tu Centro de una consulta monográfica de EPID?**

- a) Sí.                      b) No

**2- Esta tu centro/ Unidad de EPID acreditado por SEPAR? Señalar lo que proceda**

- a) Unidad básica  
b) Unidad especializada  
c) Unidad Multidisciplinar de alta complejidad

**3 - Especialidad y años de experiencia laboral incluido la residencia:**

- Neumólogo con menos de 5 años de experiencia
- Neumólogo con experiencia entre 5-10 años
- Neumólogo con más de 10 años de experiencia

**4- ¿Has recibido formación en Rehabilitación Respiratoria?**

- Si , durante la residencia
- Si porque he realizado cursos
- No he recibido ninguna formación

**5.- ¿Existe una Unidad de Rehabilitación en su centro de trabajo?**

- a) Si  
b) No

**6.- ¿Tiene asignado un rehabilitador a su servicio de Neumología ?**

- a) Si  
b) No

**7.- ¿Cuenta con un fisioterapeuta en el servicio de Respiratorio?**

- a) SI  
b) NO

**8.- ¿Existe un Rehabilitador Respiratorio en la Unidad multidisciplinar de EPID?**

- a) Si  
b) No

**9- ¿Quién realizar la Rehabilitación Respiratoria en su Hospital?**

- El rehabilitador del servicio de Rehabilitación
- El Fisioterapeuta después de que el paciente sea evaluado por el medico rehabilitador
- El Fisioterapeuta sin precisar evaluación previa por el medico rehabilitador
- El neumólogo responsable de Pruebas funcionales
- No lo hace nadie

**10.- ¿En qué lugar se realiza la Rehabilitación Respiratoria?**

- a) En el Hospital en el Servicio de Rehabilitación  
b) En el Servicio de Respiratorio (se desplaza el Rehabilitador a la Unidad)  
c) Unidades de rehabilitación de los centros de salud  
d) En el domicilio del paciente

**11- ¿Deriva a los pacientes con FPI a la Unidad de Rehabilitación Respiratoria de manera habitual?**

- a) Si
- b) No

**12.- ¿Cuándo deriva a los pacientes a la Unidad de Rehabilitación Respiratoria?**

- a) Al diagnóstico independientemente de sintomatología severidad de la afectación pulmonar
- b) Solo si el paciente esta sintomático.
- c) Si el paciente utiliza oxígeno terapia
- d) Si el paciente presenta afectación severa de la función pulmonar
- e) Cuando se deriva al paciente a trasplante pulmonar
- f) No los envío nunca a valoración

**13.- ¿Conoce en qué momento es mejor derivar al paciente de FPI a la Unidad de Rehabilitación Respiratoria?**

- a) Si
- b) No

**14.- ¿Conoce en que consiste la Rehabilitación Respiratoria en los pacientes con FPI?**

- a) Si
- b) No

**15.- Si no deriva a los pacientes con FPI a valoración por rehabilitación respiratoria , indique el motivo**

- a) Desconocimiento en que consiste la rehabilitación pulmonar en la FPI
- b) Dificultad para derivar a rehabilitación, por las listas de espera
- c) Dificultad para que los pacientes puedan acudir a realizar la rehabilitación
- d) Otros motivos: Solo si el paciente se negara por dificultades en movilización o disnea de mínimos esfuerzos

**16. ¿Se utiliza documento de derivación a la Unidad de Rehabilitación Respiratoria?**

- a) Si, Hoja de Interconsulta habitual del hospital
- b) Interconsulta telemática
- c) P 10

**17. Tras derivar al paciente a la unidad de Rehabilitación. ¿Conoce cuánto tiempo tarda en iniciarla?**

- a) Menos de 1 mes
- b) Entre 1 y 3 meses
- c) Más de 3 meses
- d) No lo sé

**18.- Tiene comunicación con el fisioterapeuta o médico rehabilitador para saber los progresos del paciente?**

- a) si
- b) No

**19- ¿Conoce si existe un “protocolo” o programa específico para pacientes con FPI en su centro, o que tipo de intervención se realiza?**

- a)Si
- b)No

**20- ¿Cuál es el principal motivo desde tu punto de vista para una valoración del paciente con FPI en una Unidad de Rehabilitación Respiratoria?**

- a)Para mejorar la sintomatología respiratoria asociada a la FPI, principalmente la disnea
- b)Para mejorar la tolerancia al ejercicio y la capacidad funcional del paciente con FPI
- c)Para mejorar la función pulmonar.
