# Supplementary material for: Survey on the Indications and Use of Respiratory Rehabilitation in Idiopathic Pulmonary Fibrosis Patients by Spanish Pulmonologists
Source: PubMed Central journal article supplement — Open Respir Arch. 2021 Apr 19;3(3):100100. [Article in Spanish] doi: 10.1016/j.opresp.2021.100100 (PMC10369541; doi:10.1016/j.opresp.2021.100100), 2021-04-19
Supplement: mmc2.pdf [file mmc2.pdf]

**Puntos claves:** Falta formación a los neumólogos en rehabilitación pulmonar en Fibrosis Pulmonar Idiopática (FPI).

- La mayoría de los neumólogos no derivan a rehabilitación respiratoria a los pacientes con FPI.
- Necesidad de mejorar la integración del rehabilitador/fisioterapeuta en el equipo de neumología para el mejor manejo multidisciplinar de los pacientes con FPI.
- Déficit de rehabilitadores y fisioterapeutas en los servicios de neumología.
- La rehabilitación respiratoria es efectiva y segura en la FPI.
